# Supplementary material
Source: PubMed Central journal article supplement (PMC7261235)
Supplement: NIHMS1591823-supplement-Suppl_emental_Item.pdf [file NIHMS1591823-supplement-Suppl_emental_Item.pdf]

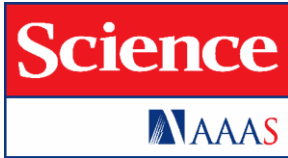

Supplementary Materials for  
**Direct stimulation of NADP<sup>+</sup> synthesis through  
Akt-mediated phosphorylation of NAD kinase**

Gerta Hoxhaj, Issam Ben-Sahra, Sophie E. Lockwood, Rebecca C. Timson,  
Vanessa Byles, Graham T. Henning, Peng Gao, Laura M. Selfors, John M. Asara,  
Brendan D. Manning\*

\*Corresponding author. Email: [bmanning@hsph.harvard.edu](mailto:bmanning@hsph.harvard.edu)

Published 8 March 2019, *Science* **363**, 1088 (2019)  
DOI: 10.1126/science.aau3903

**This PDF file includes:**

Materials and Methods  
Figs. S1 to S8  
Tables S1 and S2  
References

## **Materials and Methods:**

### **Antibodies and other reagents**

Antibodies to phospho (p)-Akt-S473 (Cell Signaling Technology (CST), 4060), Akt (CST, 4691), NADK (CST, 55948), p-RRXpS/pT (CST, 9624), p-S6K1-T389 (CST, 9234), p-S6-S240/S244 (CST, 2215), p-TSC2-T1462 (CST, 3617), p-PRAS40-T246 (CST, 2997), horse radish peroxidase (HRP)-conjugated secondary antibodies anti-mouse (CST, 7076) and anti-rabbit (CST, 7074), anti-FLAG M2 Affinity Gel (Sigma, A2220), anti-FLAG-M2 (Sigma, F1804), anti-HA (Sigma, H3663),  $\beta$ -actin (Sigma, A5316), thiazolyl Blue Tetrazolium Bromide solution (Sigma, M5655), anti-G6PD (Bethyl A300-404A), anti-C5ORF33(NADK2) (Abcam, ab181028) and IRDye 800CW Donkey anti-Mouse IgG (H+L) (Licor, 926-32212) were used. Anti-sera for p-NADK-Ser44/46 (antibodies under development) were provided by CST. Note: the NADK antibody validated by siRNA knockdown (CST, 55948) does not recognize NADK derivatives lacking the N-terminal domain. Thus, immunoblots for experiments using the  $\Delta$ N-NADK or isoform 3 variants used a different validated NADK antibody (Sigma HPA048909), raised against sequences within the kinase domain.

Human Insulin-like Growth Factor I (IGF-I), (CST #8917), insulin (Alpha diagnostic, INSL16-N-5), LPS (Invivogen, tlrl-eklps), Akt inhibitor MK-2206 (Selleckchem, S1078), mTORC1 inhibitor rapamycin (LC laboratories, R-5000), mTOR inhibitor Torin1 (Tocris, 4247), PI3K inhibitor GDC-0941 (Selleckchem, S1065), PDK1 inhibitor GSK2334470 (SelleckChem, S7087), ATP-competitive Akt inhibitor GSK690693 Selleckchem, S1113), NAMPT inhibitor FK 866 hydrochloride (Tocris, 480810),  $\beta$ -nicotinamide adenine dinucleotide hydrate (NAD) (Sigma, N7004), D-glucose 6-phosphate disodium salt hydrate (G6P) (Sigma, G7250), glucose-

6-phosphate dehydrogenase from baker's yeast (G6PD) (Sigma, G6378), adenosine triphosphate salt (ATP) (Sigma, A2383), NADP/NADPH kit (Sigma, MAK038),  $\beta$ -nicotinamide adenine dinucleotide phosphate hydrate (NADP) (Sigma, N5755),  $\beta$ -nicotinamide adenine dinucleotide phosphate, reduced tetra (cyclohexylammonium) salt (NADPH) (Sigma, N5130), folic acid (Sigma, F7876), pyridoxal hydrochloride (Sigma, P6155), riboflavin (Sigma, R9504), protease inhibitor cocktail (Sigma, P8340), IPTG (Sigma, I6758), DTAB (Sigma, D8638), Trizma® base (Sigma, T1503), Benzonase ® nuclease (Sigma, E1014), NADP/NADPH-Glo™ Assay (Promega, G9081),  $^{13}\text{C}_{31}^{5}\text{N}$ -nicotinamide (Cambridge Isotope Labs, CNLM-9757-0.001), [ $\gamma$ - $^{32}\text{P}$ ]-ATP (Perkin Elmer, BLU002A100UC), Lipofectamine RNAiMAX (ThermoFisher Scientific, 13778), Lipofectamine 3000 Transfection Reagent (Thermo Fischer, L3000015), lysozyme (Thermo, 89833), HEPES (Thermo, 15630080), Glutathione (Thermo, 78259), sodium pyruvate (Thermo, 11360-070), Corning® glutagro™ (Corning, 25-015-CI), Gibco™ 2-mercaptoethanol (Gibco, 21985023), BCA kit (Thermo, 23225), hygromycin B (Life Technologies/Invitrogen, 10687-010), polyethylenimine (PEI) (Polysciences, 23966-2), nicotinamide-free DMEM (US biologicals, D9800-17), thiamine hydrochloride (Santa Cruz, sc-205859), polybrene (Santa Cruz, sc-134220), KOD Xtreme™ Hot Start DNA Polymerase (Millipore, 71975-3), Lonza SeaPlaque® Agarose (VWR, 50101), Microcystin-LR (Enzo life sciences, ALX-350-012-C500), Bradford assay reagent (Bio-Rad) and dialyzed serum (dFBS; Life Technologies/Gibco, 26400-036) were used as indicated. Recombinant active PKB alpha (AKT1)-S473D (aa 118 - 480) (DU1850) and SGK inhibitor 14h were from MRC Protein Phosphorylation Unit Reagents and Services, University of Dundee.

## **Cell culture**

HEK293E (gift of Carol Mackintosh), immortalized (p53<sup>-/-</sup>) MEF (gift of David Kwiatkowski), and U87MG (ATCC) cell lines were maintained in Dulbecco's Modified Eagle's Medium (DMEM; Corning/Cellgro, 10-017-CV) containing 10% fetal bovine serum (FBS). MDA-MB-468 (ATCC), LnCAP (ATCC), T47D (ATCC), and A549 (ATCC) were maintained in RPMI-1640 (Corning, 10-040-CV) with 10% FBS. MCF10A cells expressing Akt2 or oncogenic Akt2-E17K in a doxycycline-inducible manner (gift of Alex Toker) were cultured as described previously (12). For insulin or IGF1 stimulation, subconfluent cells were serum-starved in DMEM for 16 hours and then stimulated with 0.5  $\mu$ M insulin or 100 ng/ml IGF1 for the indicated times. Where indicated, cells were incubated with inhibitors 30 min prior to insulin or IGF1 stimulations. Bone marrow-derived macrophages (BMDMs) were prepared as described previously (13).  $1.5 \times 10^6$  BMDMs were plated in each well of a 6-well plate in RPMI media supplemented with 10% FBS, 1X Pen/Strep, 1X Corning® glutagro™, 1X HEPES, 1X sodium pyruvate and 1X beta mercaptoethanol. 16 h post-plating, cells were pretreated with inhibitors and stimulated with LPS, as indicated.

## **cDNA constructs, RNAi, and CRISPR/Cas9**

HA-AKT-CA (myristoylated-Akt) and HA-AKT-KD (Akt<sup>K179D</sup>) were expressed from pcDNA3.1<sup>+</sup>. Full-length human NADK isoform 1 (RC200544) and NADK isoform 3 (RC231219) cDNAs in the pCMV6-entry vector were purchased from Origene. NADK variants S44A, S46A, S48A, S44/S46A, S44/S46/S48A,  $\Delta$ N (aa 1-87) NADK were generated by Dpn I-mediated site-directed mutagenesis using KOD Xtreme™ Hot Start DNA Polymerase, with mutations verified by sequencing. NADK and its variants were FLAG-tagged at the C-terminus

during PCR-based subcloning into the pGEX-6P-1 vector for bacterial expression as a GST fusion and in the pBabe-Hygro retroviral vector (HEK293E) or pSMPUW-IRES-Hygro lentiviral vector (Cell Biolabs, VPK-217; U87MG) for generation of stable human cell lines. All final constructs were sequence verified. For transient expression, NADK variants in the pCMV6 vector were used, with PEI transfection of 4 µg of plasmid DNA, and experiments were initiated 24 h post-transfection.

SmartVector Non-targeting shRNA (VSC11651) and an Inducible mCMV-TurboRFP human NADK shRNA targeting the NADK 3'UTR (V3SH11252-225668231; Dharmacon) were used to generate stable cell lines (HEK293E and U87MG) expressing control shRNAs or those targeting NADK in a doxycycline (dox)-inducible manner via lentivirus delivery and puromycin (2 µg/ml) selection. The resulting stable dox-inducible NADK knockdown cell lines were used to generate stable NADK-reconstituted cell lines using the retroviral or lentiviral NADK expression vectors described above following hygromycin (200 µg/ml) selection. shRNAs were induced with dox (0.25 µg/ml) 24 h before plating for experiments and then continued for the duration of the experiment, unless otherwise indicated.

T47D and A549 cells expressing control shRNA (pLKO.1-puro) or shRNA targeting NADK (Sigma: TRCN0000199040) were generated via lentivirus delivery and puromycin (3 µg/ml) selection. These resulting stable cell lines were used to generate stable NADK-reconstituted cell lines using lentiviral NADK expression vectors (pSMPUW-IRES-Hygro) following hygromycin (300 µg/ml) selection.

For transient siRNA-mediated knockdowns involving metabolite extraction and analyses, 20 nM ON-TARGETplus siRNA pools (Dharmacon) were transfected into cultures on 10-cm dishes with 30  $\mu$ l Lipofectamine RNAiMAX for 48 h, according to the manufacturers' instructions.

To generate HEK293E NADK knockout cells, an sgRNA sequence targeting the second exon of NADK was cloned into the PX459 CRISPR (Addgene, Plasmid #48139) vector using the following guides: Sense: AACTCCAGGTCTCATCGCCG, Antisense: CGGCGATGAGACCTGGAGTT. Two days post-transfection, cells were subjected to puromycin selection (2  $\mu$ g/ml, 48 hours) and seeded into 96-well plates as single cells using a limiting dilution method. Clonal cells were screened by immunoblotting with an NADK antibody.

### **Immunoblotting and immunoprecipitation.**

For protein extracts, cells were lysed in ice-cold 1% Triton lysis buffer (40 mM HEPES, pH 7.4, 120 mM NaCl, 1 mM EDTA, 1% Triton X-100, 10 mM sodium pyrophosphate, 10 mM glycerol 2-phosphate, 50 mM NaF, 0.5 mM sodium orthovanadate) with 1  $\mu$ M Microcystin-LR and protease inhibitor cocktail added just prior to cell lysis. Lysates were clarified by centrifugation (20,000 x g for 15 min at 4°C) and protein concentrations were determined with Bradford assay. Normalized protein lysates were subjected to SDS-PAGE followed by transferring to nitrocellulose membranes and immunoblotting with the indicated antibodies. For detection of endogenous NADK phosphorylation via immunoblot with the phospho-NADK-S44/46 antibody, 50  $\mu$ g of protein lysates were loaded on 4–15% Criterion™ TGX™ Precast gradient gels. Most

proteins were detected using enhanced chemiluminescence (ECL), while  $\beta$ -actin loading controls were detected using the Odyssey<sup>®</sup> CLx-Imaging System (LI-COR Biosciences).

For immunoprecipitation of FLAG-tagged NADK, cell lysates (2 mg) were incubated with 30  $\mu$ l of a 50% slurry of anti-FLAG M2 Affinity Gel for 3 hours. Beads were washed with lysis buffer four times and washed once with equilibration buffer (10 mM HEPES, 50 mM NaCl, protease inhibitors and 1  $\mu$ M Microcystin-LR). After completely removing the equilibration buffer, the NADK-FLAG was eluted in 40  $\mu$ l elution buffer (0.2 mg/ml 3xFLAG peptide, 10 mM HEPES, 50 mM NaCl, protease inhibitors and 1  $\mu$ M Microcystin-LR) for 1 hour at 4°C. The eluate was passed through 0.45  $\mu$ m Costar<sup>®</sup> Spin-X<sup>®</sup> Centrifuge Tube Filters. 10  $\mu$ l of 6X Laemmli sample buffer was added to the eluates. These samples were then used for immunoblotting with phospho-motif or phospho-NADK-S44/S46.

### **Measurements of NADP<sup>+</sup> and NADPH using a colorimetric enzyme-based assay**

NADP<sup>+</sup> and NADPH were measured using a modified NADP/NADPH colorimetric quantification assay (Sigma, MAK038), which involves an NADP<sup>+</sup>-cycling enzyme that converts all NADP<sup>+</sup> to NADPH for spectrophotometric detection at A450 nm. An important modification to the manufacturer's protocol was used, as we found that measurements made directly on samples prepared with the provided extraction buffer gave highly variable results. Instead, we quantified NADP/NADPH concentrations in metabolite extracts, prepared as described previously (14). Briefly, metabolite extraction from a 10 cm culture dish per sample was performed on dry ice with 80% methanol, and supernatants were dried down under nitrogen gas. Metabolites were then resuspended in 200  $\mu$ l of the manufacturer's extraction buffer and

centrifuged for 2 min at 3000g. Each sample supernatant was split in half. One half (A) was subjected to incubation at 60°C for 30 minutes to decompose NADP<sup>+</sup>, leaving only NADPH. The other half (B), containing NADP and NADPH, was left on ice for 30 min. Split samples A and B were transferred to clear-bottom 96-well plates and the NADP<sup>+</sup>-cycling enzyme was added to each for 5 min, resulting in conversion of NADP in sample B to NADPH, followed by addition of the manufacture's NADPH developing solution. NADPH was continuously monitored at 450 nm every 15 min for 2 hours. For each assay, an NADPH standard with 0, 20, 40, 60, 80, and 100 pmole/well was included. The amount of NADPH in an unknown sample was calculated from the standard curve. NADP<sup>+</sup> concentrations are equal to the difference between sample B and A. For normalization of each sample, the insoluble pellet from the metabolite extractions were solubilized with 8 M urea in 10 mM Tris (pH 8) and protein was quantified with a BCA assay kit. The data is presented as relative abundance and each data point is the average of at least four biological replicates of at least two independent experiments. A validation experiment for this assay demonstrating accurate quantification of NADP<sup>+</sup> and NADPH in both pure samples and a 1:1 mixture is provided in Fig. S1A. Figures 1A, B, C and figure S1A, B show data using this method.

### **Measurements of NADP<sup>+</sup> and NADPH using a bioluminescent enzyme-based assay**

NADP<sup>+</sup> and NADPH were also measured using NADP/NADPH-Glo™ Assay (Promega) according to the manufacturer's protocol. NADP<sup>+</sup> and NADPH are measured separately, based on their differential stabilities in acidic and basic pH (i.e. NADP is unstable in basic solution while NADPH is unstable in acidic solution). Briefly, cells grown in 6-well plates were washed twice with PBS and then resuspended in 500 µl of PBS. Cells were lysed by mixing 100 µl of the

PBS-resuspended cells with 100  $\mu$ l of base solution (0.2N NaOH with 1% DTAB). For NADP<sup>+</sup> measurement (acid treatment), 25  $\mu$ l of 0.4N HCl was added to 50  $\mu$ l of the lysed samples, which were then incubated for 15 minutes at 60°C. Simultaneously, 50  $\mu$ l of the original lysed sample (base-treated) were also incubated for 15 minutes at 60°C. After heat-treatment the samples were equilibrated at room temperature for 10 minutes before neutralizing the acid-treated cells with 25  $\mu$ l of 0.5M Trizma® base solution and the base-treated cells with 50  $\mu$ l of HCl/Trizma solution (1:1 volume of 0.4N HCl and 0.5M Trizma® base). 100  $\mu$ l of each acid- and basic-treated samples were added to 96-well white luminometer plates and the reaction was started by addition of 100  $\mu$ l of NADP/NADPH-Glo™ Detection Reagent. The reaction was incubated for 1 hour before the luminescence was recorded. Standard curves were generated using purified NADP<sup>+</sup> and NADPH prepared in the same buffers used to prepare the experimental samples. The amount of NADP<sup>+</sup> and NADPH of each samples were calculated using the standard curve. For normalization of each sample, 100  $\mu$ l of the PBS resuspended cells were pelleted and resuspended in 8 M urea in 10 mM Tris (pH 8) and protein was quantified with a BCA assay kit. The data is presented as relative abundance and each data point is the average of five biological replicates. A validation experiment for this assay is shown in Fig. S1C. The data shown in figure S1D use this method.

### **LC-MS/MS-based metabolite profiling and <sup>13</sup>C<sub>3</sub><sup>15</sup>N-nicotinamide tracing**

To determine the relative abundance of pyridine metabolites by LC-MS/MS analyses, a previously described extraction method optimized for NADP and NADPH was employed (15). Briefly, cells cultured in 10 cm plates to ~90% confluence were washed twice with cold PBS and metabolites were extracted on ice with 800  $\mu$ l of a 40:40:20 mixture of Acetonitrile/Methanol/

(10 mM Tris, pH 9.2, 200 mM NaCl). Cells were scraped and placed at -80°C for 1 hour before centrifugation at 17000g for 5 min. Supernatants were stored at -80°C (one week or less) and 25  $\mu$ l of the cleared solution was injected in a Thermo Q-Exactive (LC-MS) in line with an electrospray source and an Ultimate3000 (Thermo) series HPLC consisting of a binary pump, degasser, and auto-sampler outfitted with a Xbridge Amide column (Waters; dimensions of 4.6 mm  $\times$  100 mm and a 3.5  $\mu$ m particle size). The mobile phase A contained 95% (vol/vol) water, 5% (vol/vol) acetonitrile, 20 mM ammonium hydroxide, 20 mM ammonium acetate, pH 9.0; B was 100% Acetonitrile. The gradient was as follows: 0 min, 15% A; 2.5 min, 30% A; 7 min, 43% A; 16 min, 62% A; 16-18 min, 75% A; 18-25 min, 15% A with a flow rate of 400  $\mu$ l/min. The capillary of the ESI source was set to 275°C, with sheath gas at 45 arbitrary units, auxiliary gas at 5 arbitrary units and the spray voltage at 4.0 kV. In positive/negative polarity switching mode, an m/z scan range from 70 to 850 was chosen and MS1 data was collected at a resolution of 70,000. The automatic gain control (AGC) target was set at  $1 \times 10^6$  and the maximum injection time was 200 ms. The top 5 precursor ions were subsequently fragmented, in a data-dependent manner, using the higher energy collisional dissociation (HCD) cell set to 30% normalized collision energy in MS2 at a resolution power of 17,500. Data acquisition and analysis were carried out by Xcalibur 4.0 software and Tracefinder 2.1 software, respectively (both from Thermo Fisher Scientific). Selective ion monitoring (SIM) of metabolites measured in stable isotopic tracing experiments are listed in Table S1. Alternatively, for steady state analysis of metabolites (fig. S2A), dried pellets were re-suspended in 20  $\mu$ L HPLC-grade water for mass spectrometry and 10  $\mu$ l of the samples were injected into a 5500 QTRAP hybrid triple quadrupole mass spectrometer (AB/SCIEX) coupled to a Prominence UFLC HPLC system (Shimadzu) with Amide XBridge HILIC chromatography (Waters) via selected reaction

monitoring (SRM) and polarity switching between positive and negative modes (16). For all extractions, the remaining pellets were resuspended in 8 M Urea /10 mM Tris, pH 8, heated at 60°C degrees for 1 hour with shaking, centrifuged, and protein concentration in the supernatant was quantified using BCA kit. For [ $^{13}\text{C}_3^{15}\text{N}$ ]-nicotinamide tracing studies, cells were washed once with serum- and nicotinamide-free DMEM and then incubated in the same medium containing 4 mg/L of  $^{13}\text{C}_3^{15}\text{N}$ -nicotinamide for 1 hour or 30 min, as indicated. In experiments in which inhibitors and growth factors were used, cells were pretreated for 30 min with inhibitors prior to co-addition of growth factors in nicotinamide-free DMEM containing  $^{13}\text{C}_3^{15}\text{N}$ -nicotinamide. The nicotinamide-free media containing labeled nicotinamide was prepared using powdered DMEM (USBiological Life Sciences, D9815) supplemented with standard DMEM concentrations of Folic Acid, Niacinamide, Pyridoxal, Riboflavin, Thiamine, Glucose, Sodium Pyruvate, and, in the place of nicotinamide,  $^{13}\text{C}_3^{15}\text{N}$ -nicotinamide, pH adjusted to 7.2.

### **mRNA expression analysis**

For mRNA expression quantification, total cellular RNA was isolated with an RNeasy kit (Qiagen) from cells grown to near confluency grown in 6-well plates. cDNA was generated from 1  $\mu\text{g}$  of total RNA using the RNA to cDNA EcoDry™ Premix (Takara, 639545), diluted in nuclease free water (1:10) before quantification by real-time PCR using a Biorad CFX Connect Real-Time PCR Detection System. Each reaction contains 5 ng of cDNA, SYBR Green PCR mix (SYBR Green Master Mix®, Biorad) and the specified primers (Table S3). Transcript levels for NADK and NADK2 were normalized to control RPLP0 transcript levels and the data was presented as fold change relative to the average of the control samples. Each sample presented is

the average of three biological triplicates measured in technical triplicates. The data is representative of two independent experiments. The primer sequences are shown below.

### **LC-MS/MS-based phospho-peptide analyses**

Human NADK-FLAG immunoprecipitates were eluted with 3xFLAG peptide, separated by SDS-PAGE, stained with Coomassie Protein Stain (Expedeon), and NADK bands were excised. Coomassie stained gel pieces were reduced with 55 mM DTT, alkylated with 10 mM iodoacetamide, and digested overnight with TPCK modified trypsin (Promega) at pH 8.3. Peptides were extracted, dried in a SpeedVac, resuspended in 10  $\mu$ L of 50% ACN, 6% TFA and rocked on a shaker for 15 min. Phosphopeptides were enriched by loading peptide mixture on TiO<sub>2</sub> tips (Poly LC) and incubated for 30 min followed by wash with 10  $\mu$ L 50% ACN/1% TFA and centrifugation at 1500 rpm 0.5 min, repeated two times, eluted three times with 10  $\mu$ L 40% ACN, 15% NH<sub>4</sub>OH, added 60  $\mu$ L buffer A (0.1% formic acid/99.9% water) and dried down to 5  $\mu$ L. The samples were analyzed by positive ion mode LC-MS/MS using a high-resolution hybrid QExactive HF Orbitrap Mass Spectrometer (Thermo Fisher Scientific) via HCD with data-dependent analysis (DDA). Peptides were delivered and separated using an EASY-nLC nanoflow HPLC (Thermo Fisher Scientific) at 300 nL/min using self-packed 15 cm length  $\times$  75  $\mu$ m i.d. C18 fritted microcapillary columns. Solvent gradient conditions were 90 minutes from 2% B buffer to 38% B (B buffer: 100% acetonitrile; A buffer: 0.9% acetonitrile/0.1% formic acid/99.0% water). MS/MS spectra were identified using Mascot Version 2.5.1 (Matrix Science) by searching the decoy and human protein database (UniProt) with a parent ion tolerance of 18 ppm and fragment ion tolerance of 0.05 Da. Carbamidomethylation of Cys (+57.0293 Da) was specified as a fixed modification and oxidation of Met (+15.9949), phosphorylation of

Ser/Thr/Tyr (+79.97) as variable modifications. Results were imported into Scaffold Q+S 4.8 software (Proteome Software) with a peptide threshold of ~80%, protein threshold of 95%, resulting in a peptide false discovery rate (FDR) of ~1%. Known contaminants such as keratins, caseins, trypsin and BSA were removed from the analysis.

### **Sequence Alignments**

NADK amino acid sequences for different species were obtained from Uniprot (<http://www.uniprot.org/>). Amino acid and nucleotide sequences for human NADK isoform 1 (NADK-201, NP\_075394), isoform 2 (NADK-204, NP\_001185923) and isoform 3 (NADK-203, NP\_001185924) were obtained from genome browser Ensembl (<http://www.ensembl.org>). Multiple sequence alignments were done using Clustal Omega. The alignments were visualized in Jalview (<http://www.jalview.org/>), where color intensity was adjusted according to the default conservation threshold value of 30.

### **Akt kinase assays on recombinant NADK**

2 µg of bacterially-expressed GST-NADK or GST-NADK S/A variants on glutathione beads were incubated with purified His-PKB alpha (Akt1) S473D (aa 118-480) in a 50 µl reaction volume containing 50 mM Tris/HCl pH 7.5, 1 mM DTT, 0.1 mM EGTA, 10 mM magnesium acetate, 100 µM [ $\gamma$ -<sup>32</sup>P]-ATP at 30°C for the indicated times. Akt kinase was used at 5U/ml, where one unit of protein kinase activity is the amount of enzyme that catalyzes the incorporation of 1 nmol phosphate into standard substrate in 1 min.

### **Mouse experiment**

C57BL/6J mice were obtained from Jackson labs. 8-week-old mice were fasted for 12 hours during the light cycle (7am-7pm) and either humanely euthanized or refed in the dark cycle (7pm-7am) with a low fat/high carbohydrate diet (Harlan Teklan, TD.88122) followed by euthanization. Perigonadal fat pads were removed and frozen in liquid nitrogen. Half of this tissue was homogenized (30 seconds) with a tissue grinder in 150  $\mu$ l of ice-cold 1% Triton lysis buffer supplemented with 1  $\mu$ M Microcystin-LR and protease inhibitor cocktail. All animal procedures were approved by the Harvard Medical Area Institutional Animal Care and Use Committee.

### **Purification of bacterially-expressed NADK.**

GST-NADK or S/A variants expressed from the pGEX-6P-1 vector were purified from *E. coli* BL21 after induction with 1 mM isopropyl- $\beta$ -D-thiogalactopyranoside (IPTG) for 16 hours at 28°C. Single colonies were first verified for similar expression across NADK variants and then selected clones were used for purifications. Bacterial pellets were resuspended in ice-cold resuspension buffer (50 mM HEPES pH 7.4, 140 mM NaCl, 1 mM EDTA, pH 8) supplemented with 1 mM DTT and 1:100 protease inhibitor cocktail. Lysates were produced using 0.25 mg/ml lysozyme with rocking for 15 min at 4°C, followed by another 30 min incubation at 4°C with 0.2% Triton X-100. Nucleic acids were removed by a final 30 min incubation with Benzonase. Lysates were clarified by centrifuged at 16,000g for 15 min at 4°C and supernatants were collected for subsequent purification. GST-NADK-containing lysates were incubated with glutathione beads for 2 hours at 4°C, and beads were washed three times in wash buffer (50 mM HEPES, pH 7.5, 0.2 M NaCl, 0.1% Triton X-100 supplemented with protease inhibitors) and once in PBS plus protease inhibitors. Precipitated GST-NADK was then subjected to in vitro Akt

kinase assay, or eluted from the beads after the kinase assay using 30 mM glutathione in PBS (pH 7.2) for 1 hour at 4°C for use in NADK enzymatic assays. Purified NADK was quantified on a Coomassie-stained gel with adjacent BSA standards.

### **NADK enzymatic assay**

Approximately 0.5 µg of purified NADK or NADK variants was subjected to an NADK enzymatic assays that couples its generation of NADP<sup>+</sup> to G6PD-mediated production of NADPH, which is then measured as a change in A340 over time. The assay was performed in a 100 µl reaction in 96-well plate containing 10 mM ATP, 10 mM glucose-6-phosphate, 0.5 U G6PD, 10 mM MgCl<sub>2</sub>, 100 mM Tris-HCl (pH 8.0) and varying concentrations of the substrate NAD<sup>+</sup> (1 mM, 2 mM, 5 mM, 10 mM). Measurements of A340 were made every 2 minutes for 20 min at 37°C. To measure the effects of NADK phosphorylation on its enzymatic activity, NADK was subjected to *in vitro* phosphorylation by Akt as follows: HEK293E cells expressing FLAG-tagged NADK or NADK-S44/46/48A (3A) (three 15 cm dishes each) were serum-starved overnight and treated with wortmannin (200 nM) for the last hour to inhibit PI3K-Akt signaling. Cells were lysed in substrate buffer (50 mM HEPES, 250 mM NaCl, 1% Triton and 1X protease inhibitor cocktail), and NADK was immunoprecipitated for 3 hours with FLAG-affinity gel (70 µl of settled beads). After three washes in substrate buffer, NADK bound to the beads was phosphorylated with purified, active Akt in a reaction volume of 100 µl containing 50 mM Tris/HCl pH 7.5, 1 mM DTT, 0.1 mM EGTA, 10 mM magnesium acetate, 0.2 mM ATP at 30°C for 1 hour with shaking. Akt was removed by washing the beads 4 times with lysis buffer and once in equilibration buffer. NADK was then eluted with 100 µl of 3X FLAG peptide at 4°C for 1 hour. 5-10% of the eluate was subjected to Coomassie staining to quantify the amount of

NADK. The reaction was then performed using ~ 0.5 µg of purified NADK. Note: cell lysates or purified NADK enzyme should not be frozen during this procedure, as freezing adversely affects NADK enzymatic activity.

### **Soft agar colony formation assay**

For soft agar assays, 6000 cells in 2 ml of growth media (RPMI+10% FBS+2 µg/ml puromycin+ 200 µg/ml hygromycin B) containing 0.34% agarose (Lonza SeaPlaque® Agarose) were seeded in 6-well plates with a bottom layer of 0.5% agarose (prepared in the same growth media as the top layer). Cells were fed every 5 days with 0.5 ml of growth media. Colonies were detected after 4 weeks by staining with 1 ml of 0.5 mg/ml of thiazolyl Blue Tetrazolium Bromide solution for 2 hours. Colony number was determined using the OpenCFU software (<http://opencfu.sourceforge.net>). Images presented in the manuscript are representative of three biological replicates from two independent experiments.

### **Analysis of NADK isoform expression in GTEx RNA-seq data**

Exon and splice junction raw count data were downloaded from The Genotype-Tissue Expression (GTEx) project (<https://gtexportal.org/home/>, version 7). Reads per kilobase per million reads (RPKM) values for each exon were calculated. Isoform 3 expression estimates were defined as the RPKM value for the unique first exon of Isoform-3 (chr1:1689804-1690081 (hg19 genome)). Isoform 1 expression estimates were the sum of the RPKM values mapped to two exons (chr1:1710185-1710290 and chr1:1709728-1709909) specific to the each of the splice variants that encode Isoform 1. Splice junction data was used to determine whether reads spanning the splice junctions unique to Isoform 1 (chr1:1696885-;chr1:1710185 or

chr1:1696885:-,chr1:1709728) and Isoform 3 (chr1:1688749:-,chr1:1689804) were detected in samples.

### **Statistical Analysis**

All error bars represent standard deviation. For pairwise comparisons, two-tailed Student's *t* tests were used. P values < 0.05 are denoted as statistically significant.

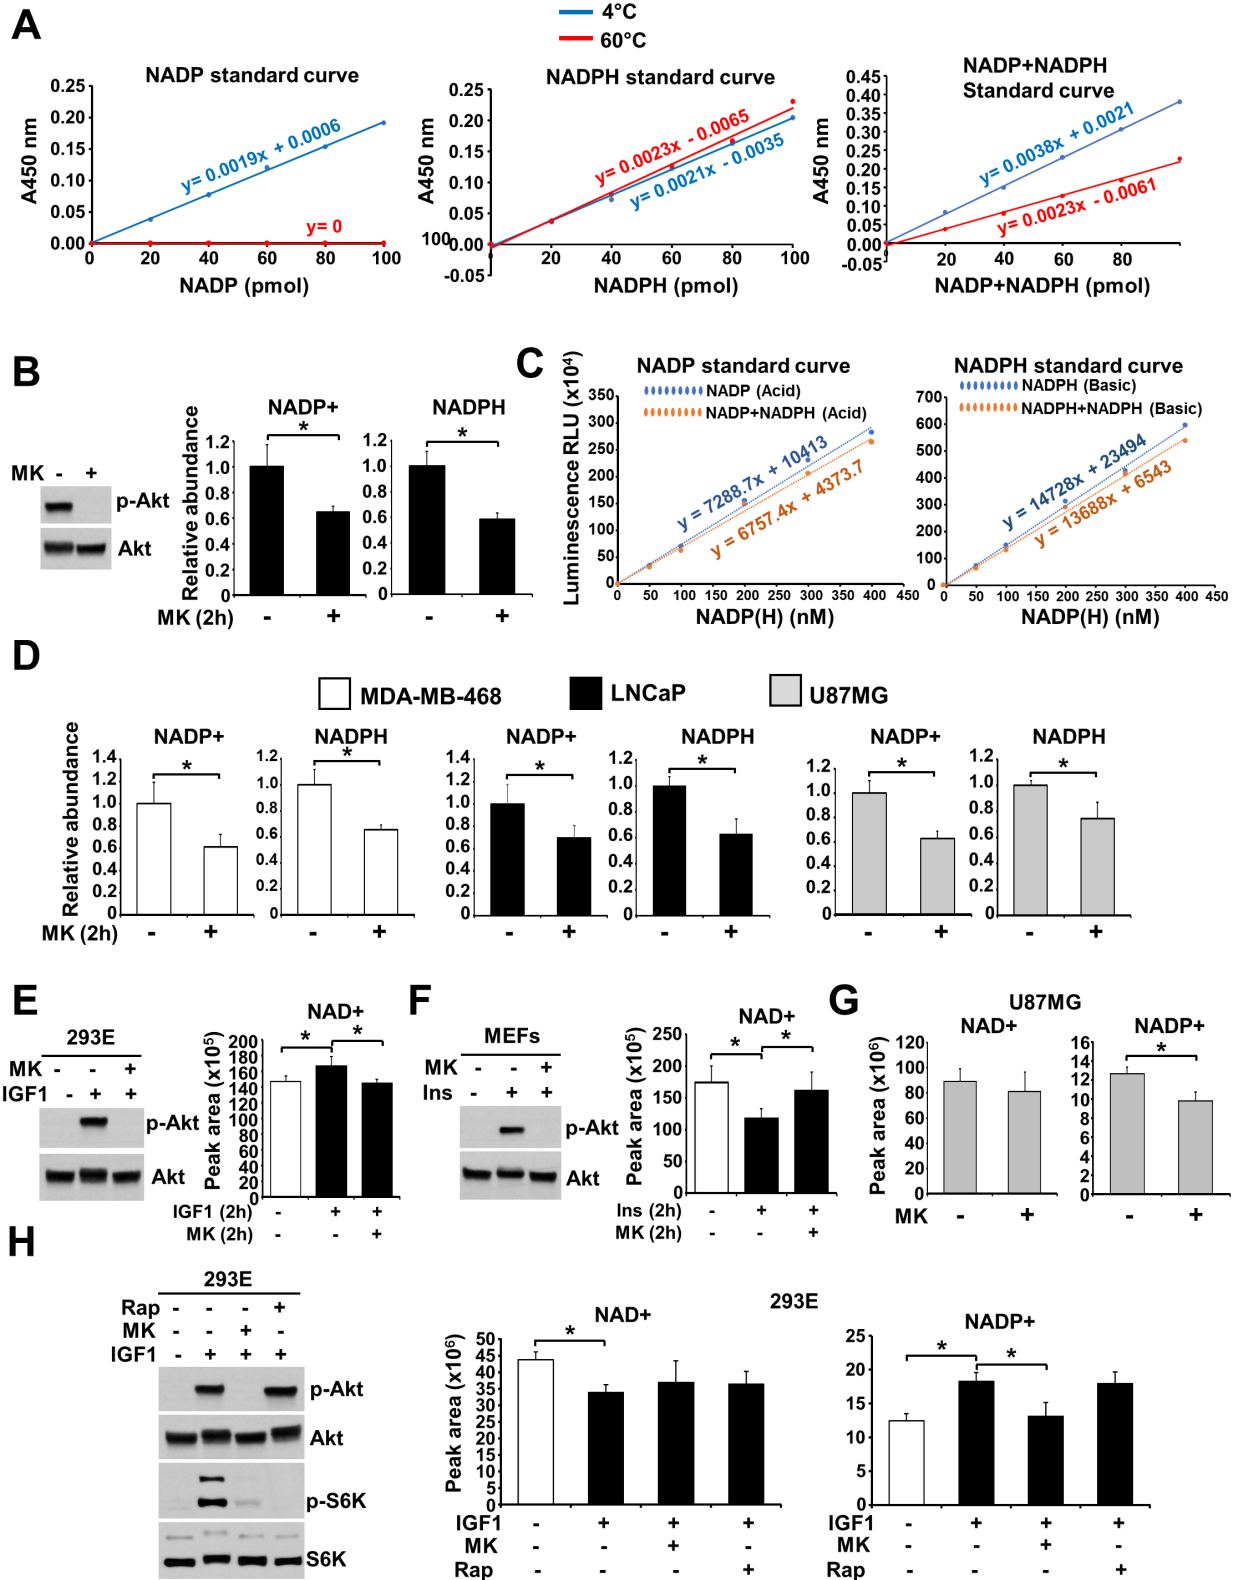

**Fig. S1. Data supporting Figure 1A-E.**

(A) Standard curves were generated from pure NADP<sup>+</sup> and NADPH standards that, where indicated, were subjected to heating (60°C, 30 min) to decompose NADP. Increasing concentrations of NADP<sup>+</sup> (left), NADPH (middle), and a 1:1 mixture of NADP and NADPH (right) were measured using the NADP/NADPH quantification assay used in Fig. 1A-C (see methods).

(B) Relative abundance of NADP<sup>+</sup> and NADPH from HEK293E cells grow in full serum (10% FBS) and treated for 2 hours with vehicle (DMSO) or MK-2206 (2 μM) were quantified as in (A). Data are presented as the mean ± SD of biological quintuplicates.

(C) Standard curves were generated from pure NADP<sup>+</sup> and NADPH and a 1:1 mixture of NADP and NADPH using a bioluminescent enzyme-based assay. Samples were subjected to acidic and basic extraction for specifically measuring NADP and NADPH, respectively (see methods).

(D) Relative abundance of NADP<sup>+</sup> and NADPH from PTEN-deficient cell lines, serum-deprived 16 hours and treated 2 hours with vehicle or MK-2206 (2 μM) were quantified as in (C). Data are presented as the mean ± SD of biological quintuplicates.

(E, F). Immunoblots and normalized peak areas of NAD<sup>+</sup> from the experimental samples in Fig. 1D (E) and 1E (F).

(G) Normalized peak areas of NAD<sup>+</sup> and NADP<sup>+</sup> measured by targeted LC-MS/MS from U87MG cells serum-deprived for 16 hours and treated with 2 μM MK-2206 for the last 2 hours.

(H) Immunoblots and normalized peak areas of NAD<sup>+</sup> and NADP<sup>+</sup> measured by targeted LC-MS/MS from HEK293E cells that were serum-starved for 16 hours and pretreated with MK-2206 (2 μM, 30 min) or rapamycin (20 nM, 30 min) prior to stimulation with IGF1 (100ng/ml, 1 hour).

**(B, G, H)** Data are presented as the mean  $\pm$  SD of biological quadruplicates and are representative of two independent experiments. \*P < 0.05 for pairwise comparisons calculated using a two-tailed Student's t-test.

**A**

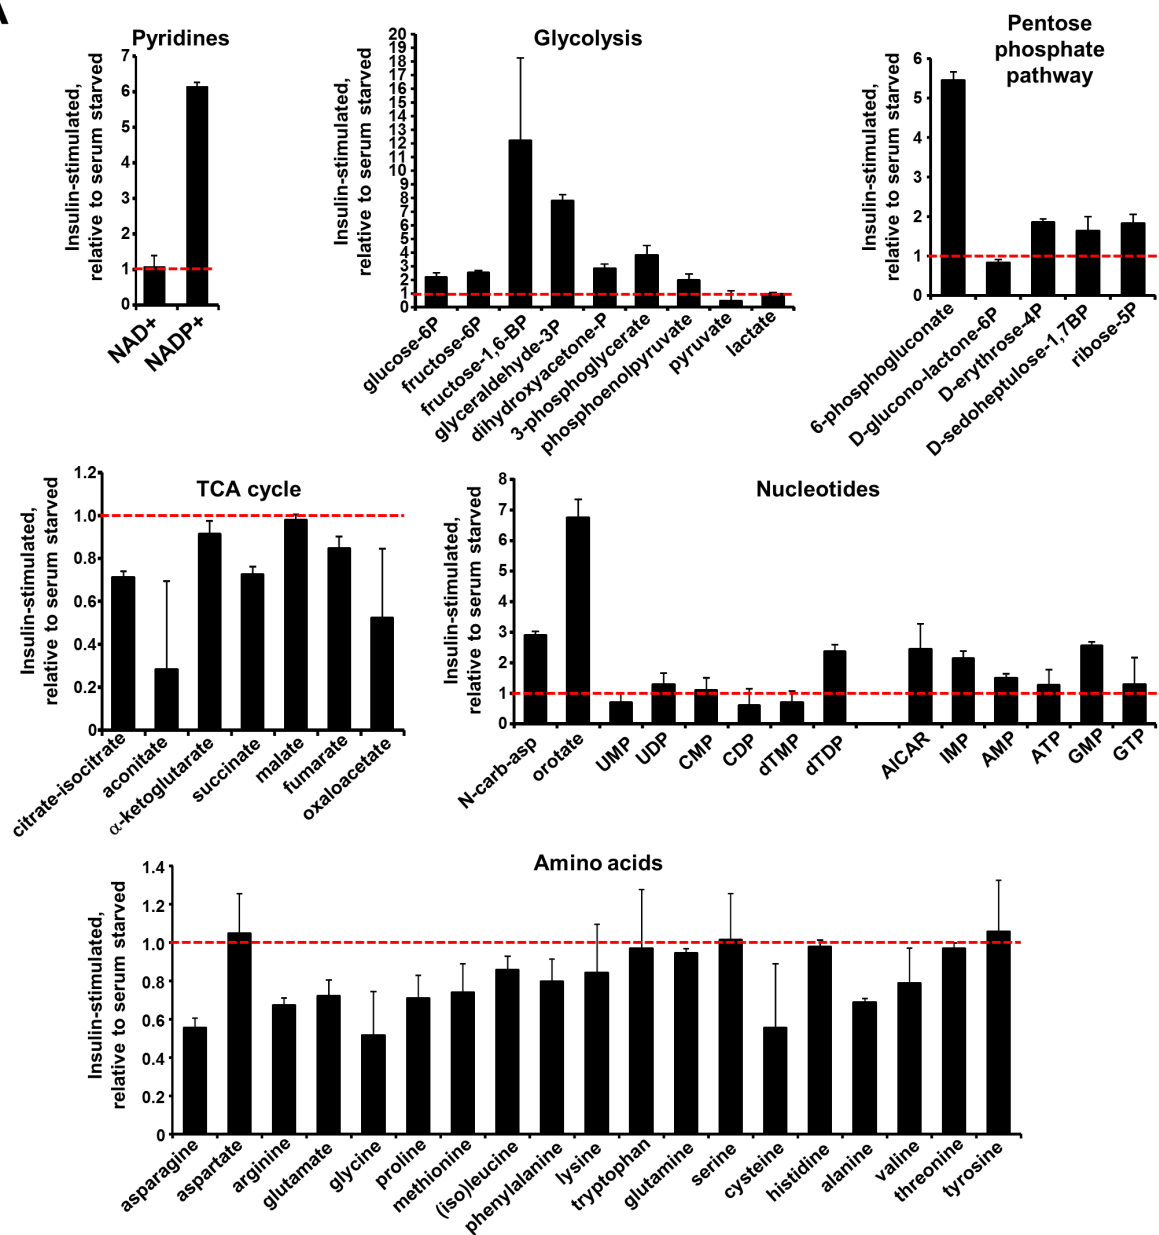

**B**

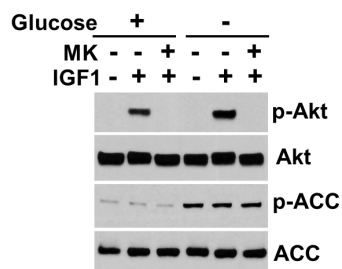

**C**

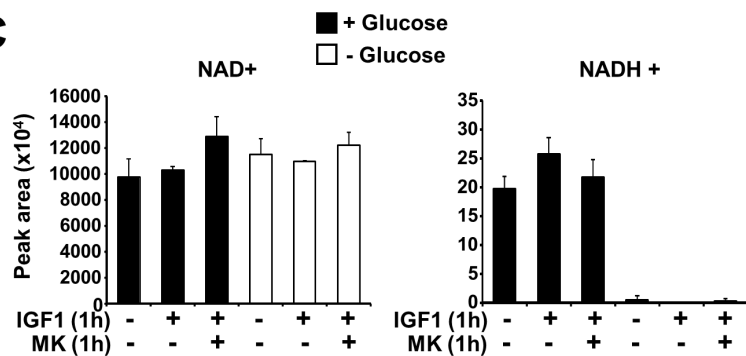

**Fig. S2. Data supporting Figure 1**

(A) HeLa cells were deprived of serum (15 hours) and then treated with insulin (0.5  $\mu$ M, 1 hour).

The indicated metabolites measured by targeted LC-MS/MS are shown as insulin-stimulated abundance relative to unstimulated, indicated by the dashed red line.

(B, C) Immunoblots (B) and normalized peak areas of NAD<sup>+</sup> and NADH from the experimental samples in Fig. 1F (C).

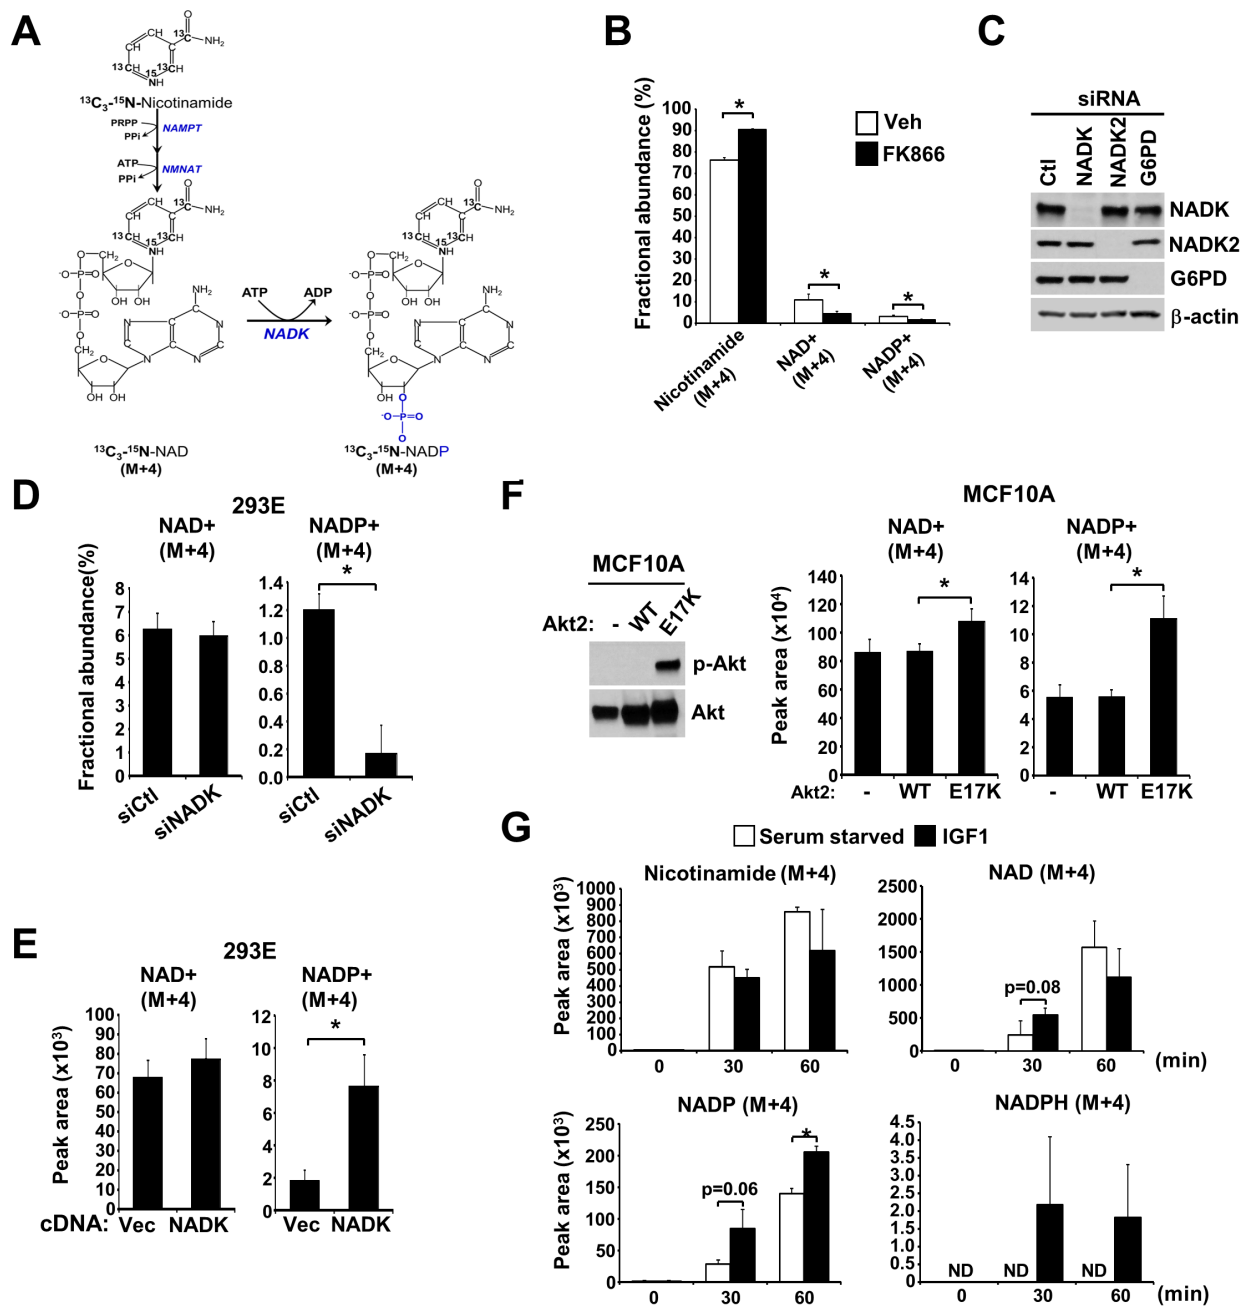

**Fig. S3. Data supporting Figure 1G-K.**

(A) Schematic of the NAD salvage pathway and  $^{13}\text{C}_3$ - $^{15}\text{N}$ -nicotinamide stable-isotope tracing into  $\text{NAD}^+$  and  $\text{NADP}^+$ , which results in the appearance of M+4 mass isotopomers of these metabolites. PRPP: phosphoribosyl pyrophosphate.

(B) Fractional abundance (%) of nicotinamide (M+4),  $\text{NAD}^+$  (M+4) and  $\text{NADP}^+$  (M+4) from the experimental samples in Fig. 1H are shown.

(C) Immunoblots were performed in parallel samples prepared as described in Fig. 1I.

(D) Fractional abundance (%) of  $\text{NAD}^+$  (M+4) and  $\text{NADP}^+$  (M+4) from Fig. 1I.

(E) HEK293E cells transfected with empty vector (Vec) or NADK for 24 hours were grown in full serum and labeled with  $^{13}\text{C}_3$ - $^{15}\text{N}$ -nicotinamide for 1 hour. Normalized peak areas of  $\text{NAD}^+$  (M+4) and  $\text{NADP}^+$  (M+4) were measured by targeted LC-MS/MS.

(F) MCF10A cells stably expressing empty vector (-), Akt2 (WT) or oncogenic Akt2 (E17K) in a doxycycline-inducible manner were cultured in the presence of doxycycline (0.15  $\mu\text{g/ml}$ , 36 hours). Cells were serum deprived for 16 hours in the presence of doxycycline (0.15  $\mu\text{g/ml}$ ) and labeled with  $^{13}\text{C}_3$ - $^{15}\text{N}$ -nicotinamide media for the final 1 hour. Normalized peak areas of  $\text{NAD}^+$  (M+4) and  $\text{NADP}^+$  (M+4) were measured by targeted LC-MS/MS.

(G) HEK293E cells were serum deprived for 16 hours prior to IGF1 (100 ng/ml) and  $^{13}\text{C}_3$ - $^{15}\text{N}$ -nicotinamide labelling for the indicated times. Normalized peak areas of nicotinamide (M+4),  $\text{NAD}^+$  (M+4),  $\text{NADP}^+$  (M+4) and NADPH (M+4) were measured by targeted LC-MS/MS.

(E-G) Data are presented as the mean  $\pm$  SD of biological quadruplicates and are representative of two independent experiments. \* $P < 0.05$  for pairwise comparisons calculated using a two-tailed Student's t-test.

**A**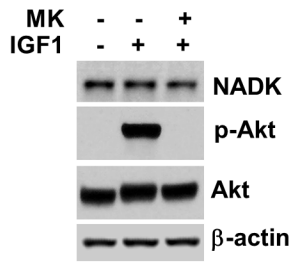**B**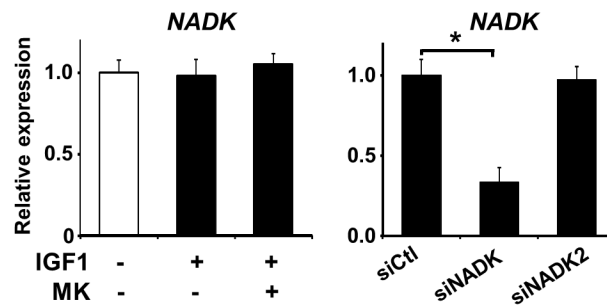**C**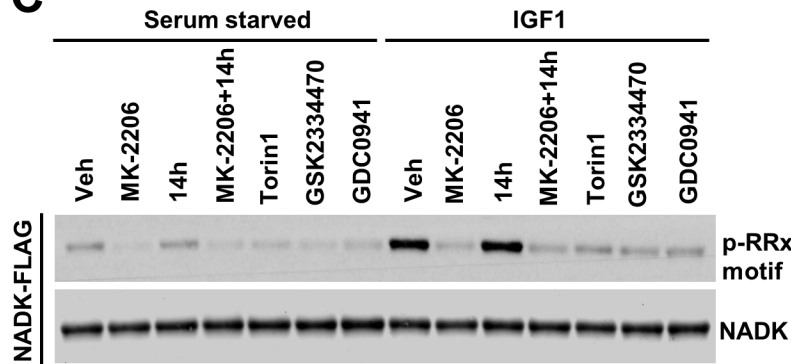**D**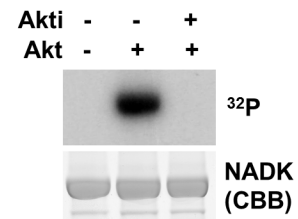**E**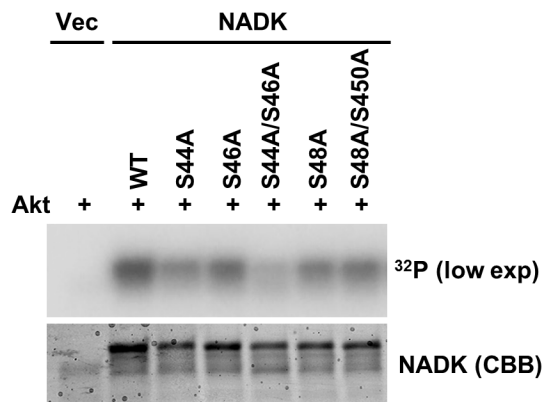**F**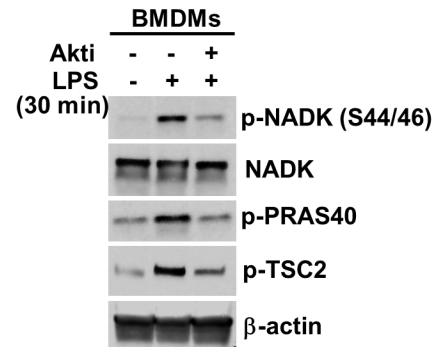**G**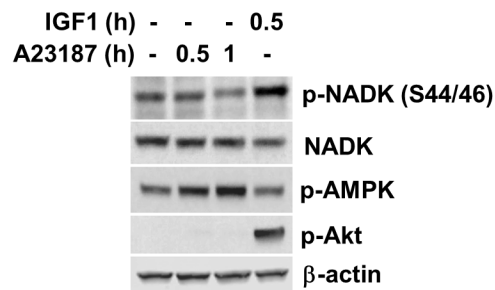

**Fig. S4. Data supporting Figure 2.**

(A) Immunoblot from HEK293E cells serum-deprived overnight and pretreated with MK-2206 (2  $\mu$ M, 30 min) prior to treatment with IGF1 (100 ng/ml, 2 hour).

(B) The relative abundance of NADK transcripts are shown for samples treated as in (A) or following siRNA-mediated knockdown of NADK or NADK2. Data are graphed as mean  $\pm$  SD of biological triplicates and are representative of two independent experiments. \*P < 0.05 by two-tailed Student's t test.

(C) FLAG-tagged NADK was immunoprecipitated from HEK293E cells deprived of serum for 16 hours, pretreated for 30 min with vehicle (Veh), Akt inhibitor MK-2206 (2  $\mu$ M), SGK1 inhibitor 14h (1  $\mu$ M), mTOR catalytic inhibitor Torin1 (250 nM), PDK1 inhibitor GSK2334470 (1  $\mu$ M), or pan-PI3K inhibitor GDC-0941 (1  $\mu$ M) prior to treatment with IGF1 (100 ng/ml, 30 min). NADK phosphorylation was detected using the indicated phospho-motif antibody.

(D) In vitro kinase assays were performed using recombinant active Akt1 and bacterially-purified GST-NADK in the presence of [ $\gamma$ -<sup>32</sup>P] ATP and the ATP-competitive Akt inhibitor GSK690693 (5  $\mu$ M), where indicated. Reactions were stopped after 15 minutes and detected by autoradiography. CBB, Coomassie brilliant blue showing total NADK in the reaction.

(E) As in (D), but NADK-FLAG or the indicated S/A mutants were immunopurified from serum-deprived HEK293E cells treated with the PI3K inhibitor wortmannin (200 nM, 1 hour).

(F) Endogenous NADK was detected with a phospho-NADK (S44/46) antibody in lysates of primary BMDMs that were pretreated with the Akt inhibitor GSK690693 (5  $\mu$ M, 30 min) prior to stimulation with LPS (100 ng/ml, 30 min).

(G) Endogenous NADK phosphorylation was detected in HEK293E cells serum deprived for 16 hours prior to treatment with the calcium ionophore A23187 (10  $\mu$ M) and IGF1 (100 ng/ml) for

the indicated times. Phospho-AMPK (T172) is a positive control for  $\text{Ca}^{2+}$ -dependent phosphorylation upon A23187 treatment.

**A**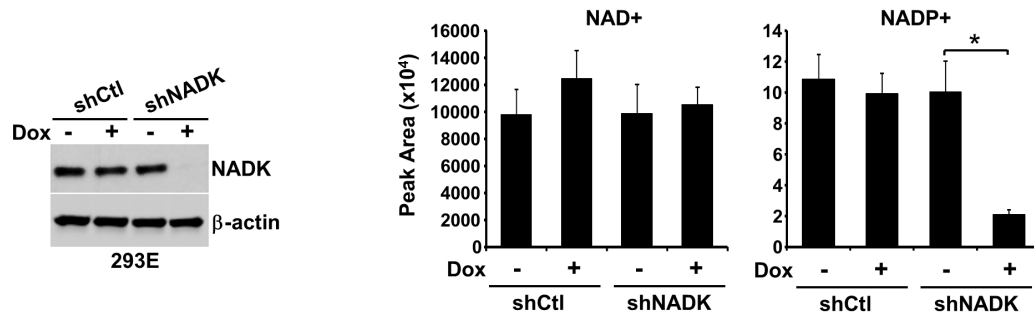**B**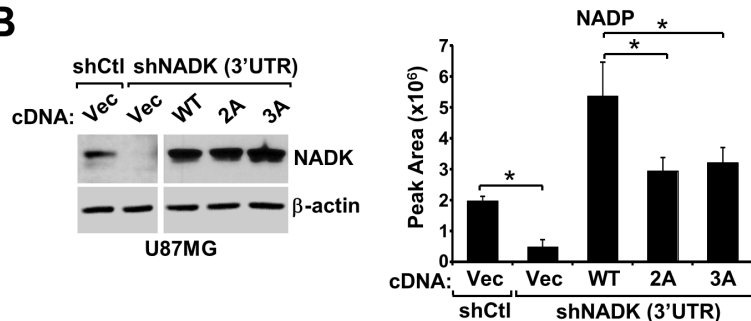**C**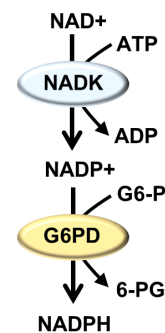**D**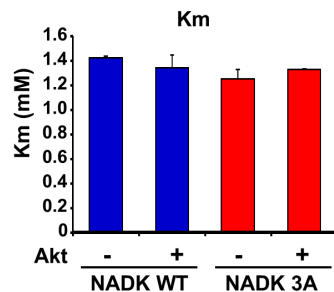**E**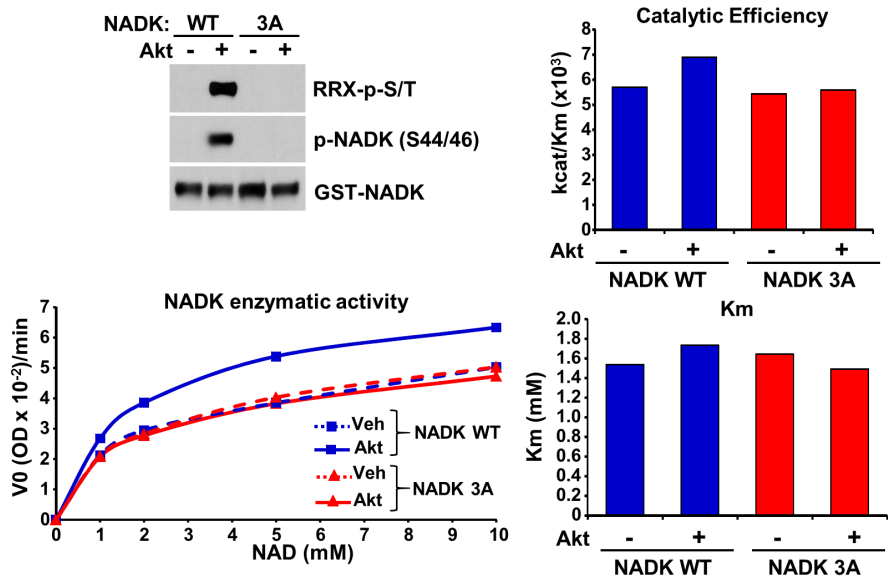**F**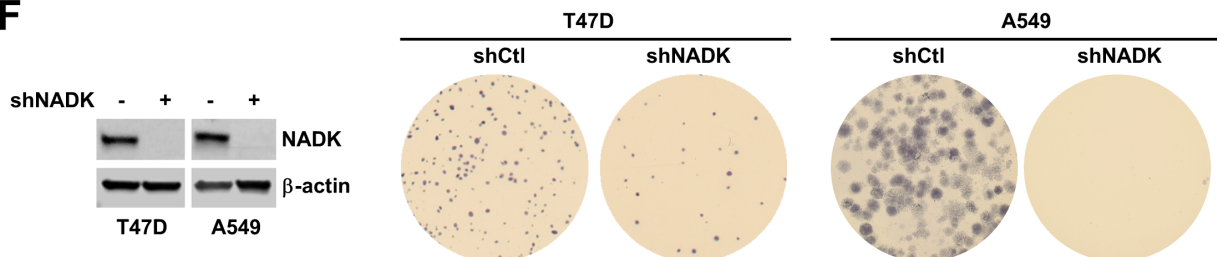

**Fig. S5. Data supporting Figure 3.**

(A) HEK293E cells stably expressing doxycycline-inducible control shRNA (shCtl) or shRNA targeting the 3'UTR of NADK were cultured in the presence or absence of doxycycline (0.25  $\mu$ g/ml, 48 hours). Immunoblots and normalized peak areas of NAD<sup>+</sup> and NADP<sup>+</sup> measured by targeted LC-MS/MS are shown.

(B) U87MG cells with stable shRNA-mediated knockdown of NADK were stably transfected with empty vector (Vec), NADK (WT), or NADK phospho-mutants S44/46A (2A) or S44/46/48A (3A). Cells were grown in the presence of doxycycline (0.25  $\mu$ g/ml, 36 hours) and serum deprived (16 hours) in the presence of doxycycline. Immunoblots and normalized peak areas of NADP<sup>+</sup> are shown. (A, B) Data are presented as the mean  $\pm$  SD of biological quadruplicates and are representative of two independent experiments. \*P < 0.05 for pairwise comparisons calculated using a two-tailed Student's t-test.

(C) Schematic of the coupled NADK enzymatic assay employed in which NADK-produced NADP<sup>+</sup> is used by purified G6PD to generate NADPH, which is measured by spectrophotometric absorbance at A340.

(D) K<sub>m</sub> of NADK-WT and -3A for NAD<sup>+</sup> calculated from the experiment shown Fig. 3D-F.

(E) Recombinant, bacterially purified NADK-WT or 3A mutant was phosphorylated with purified active Akt in vitro and subjected to immunoblot and an assay of NADK activity measured over a range of NAD<sup>+</sup> concentrations (see methods for more details).

(F) Soft agar colony formation assay from T47D and A549 cells with stable shRNA-mediated knockdown of NADK. Images from T47D cells were magnified by 3X. Images presented are representative of two independent experiments performed in biological triplicates. Immunoblots show NADK levels.

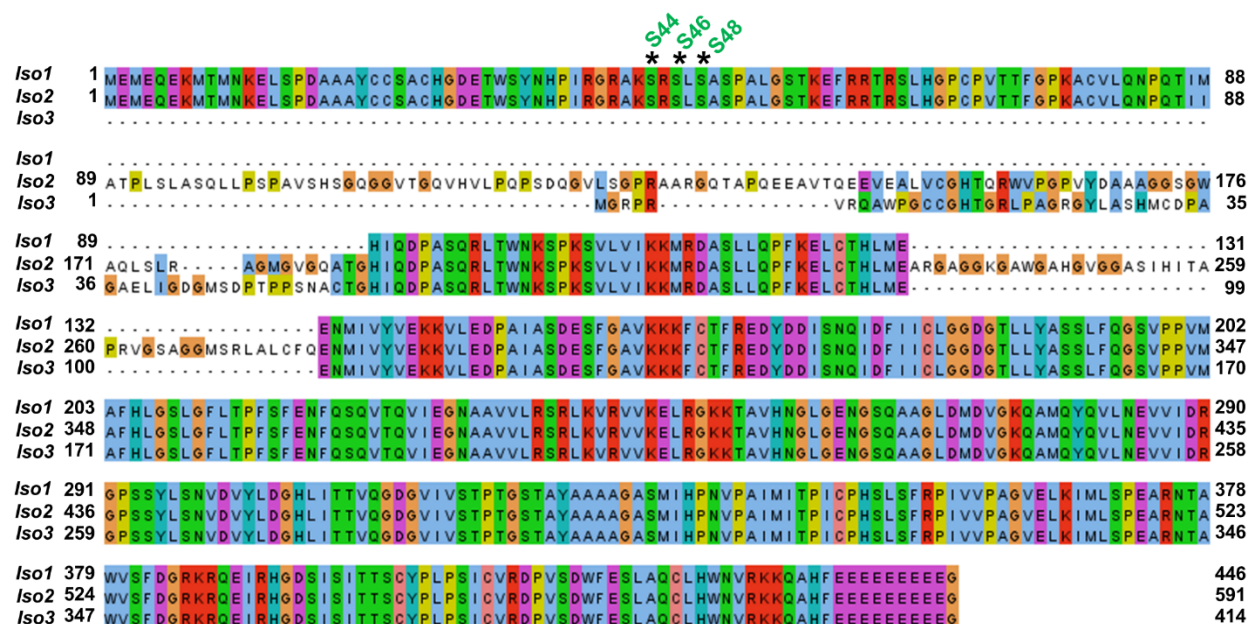

**Fig. S6. NADK sequence alignment supporting Figure 4.**

Sequence alignment of human NADK isoform 1 (NP\_075394; Iso1), isoform 2 (NP\_001185923; Iso2), and isoform 3 (NP\_001185924; Iso3) using Clustal Omega, with the Akt phosphorylation sites (S44, S46, S48) denoted within the N-terminal regulatory domain shared between isoforms 1 and 2, but absent from predicted isoform 3.

**A**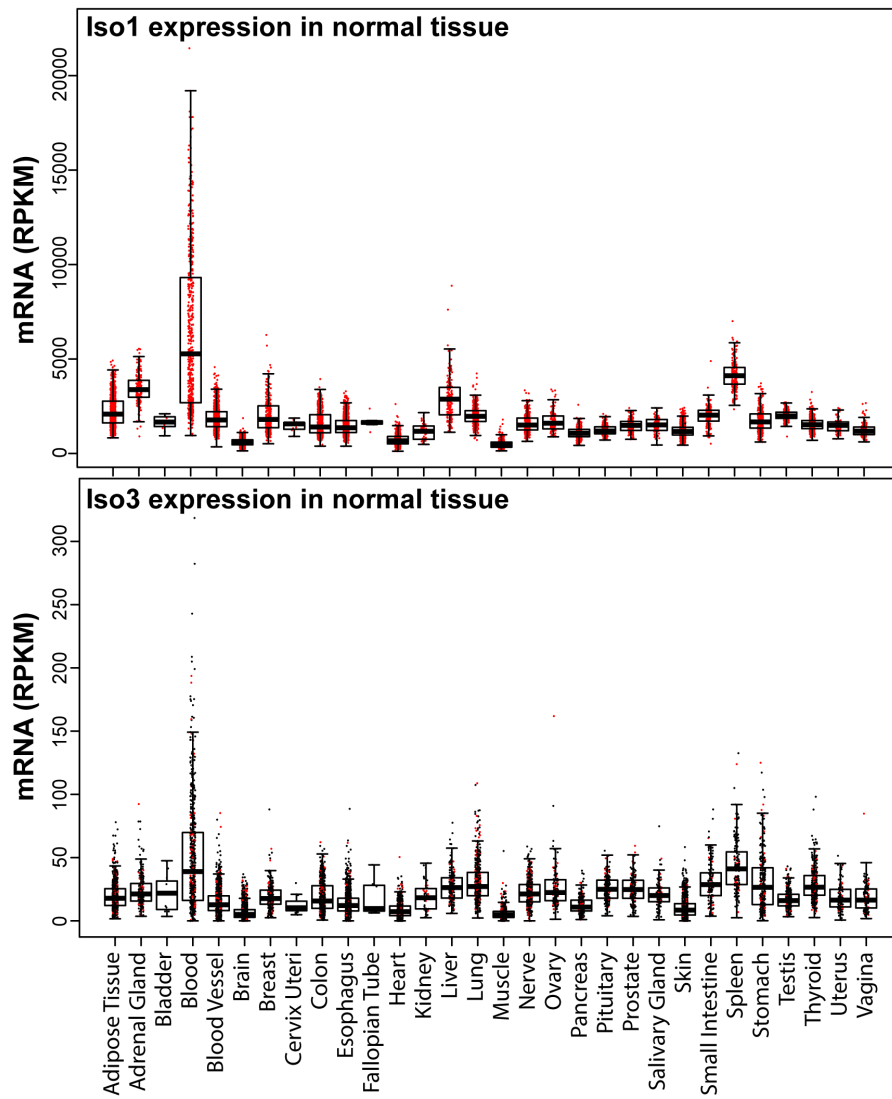**B**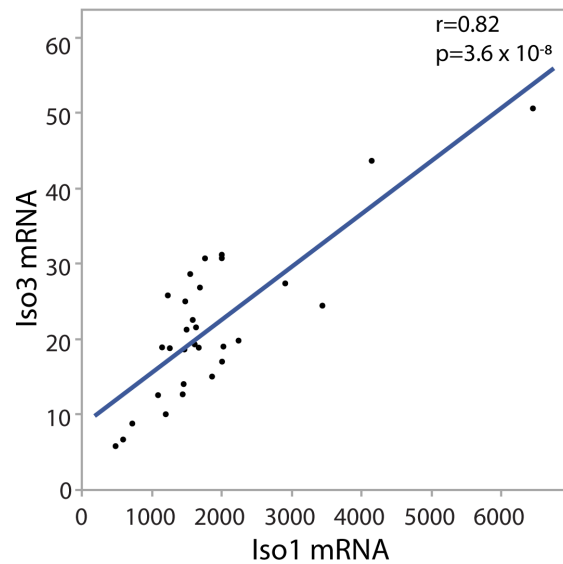

**Fig. S7. RNA-seq data from GTEx for NADK isoforms 1 and 3, demonstrating the existence but low expression of isoform 3 transcripts.**

(A) mRNA abundance, expressed as reads per kilobase per million reads (RPKM), for NADK isoform 1 (top) and isoform 3 (bottom) from a range of normal tissues. Each dot represents a tissue sample; red dots indicate the detection of a read that spans an isoform-specific splice junction. Boxes define the interquartile range (IQR), the horizontal line indicates the median, and the whiskers represent the upper and lower quartiles  $\pm 1.5 \times \text{IQR}$ .

(B) Correlation between NADK isoform 1 (Iso1) and isoform 3 (Iso3) expression showing high correlation across tissues ( $r=0.82$ ,  $p=3.6 \times 10^{-8}$ , Pearson's correlation).

**A**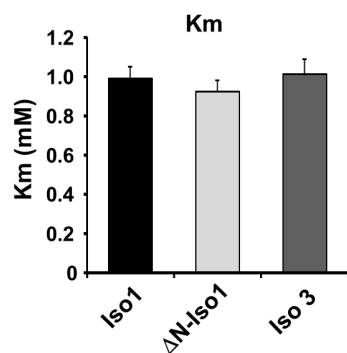**B**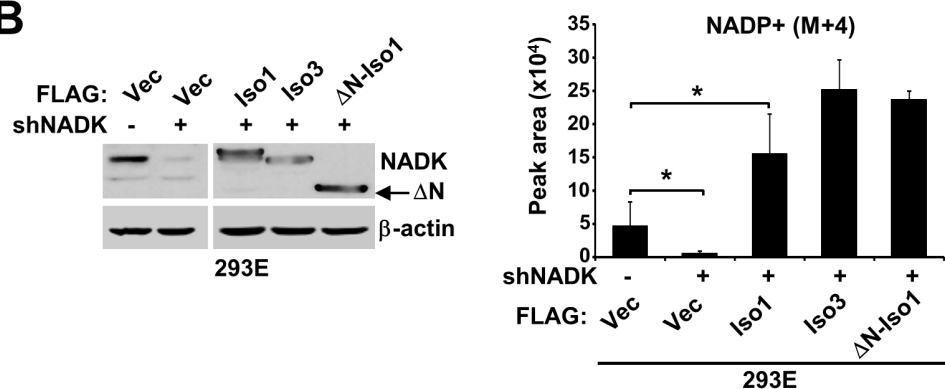**C**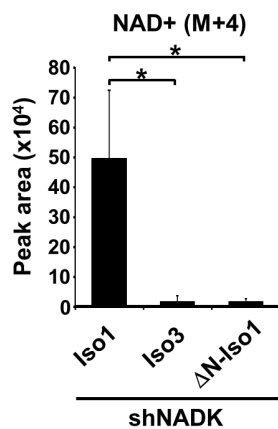**D**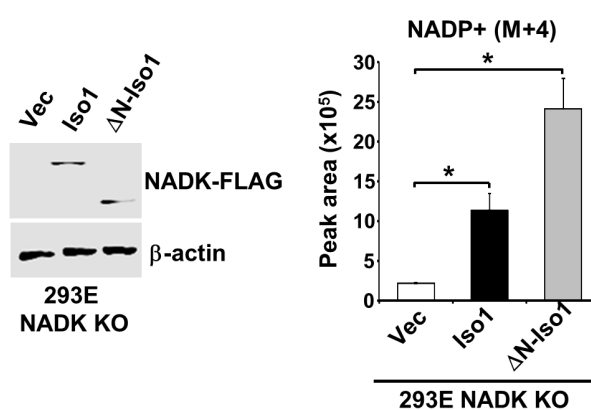**E**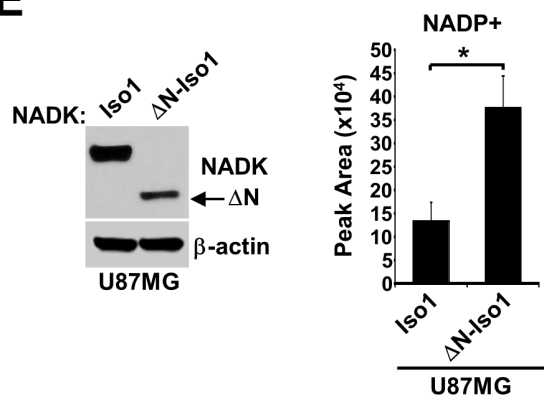

**Fig. S8. Data supporting Figure 4B and C.**

(A)  $K_m$  of NADK isoforms for  $\text{NAD}^+$  calculated from the experiment shown in Fig. 4B.

(B, C) NADK-isoform 1, -isoform 3 or  $\Delta\text{N}$ -isoform 1 (lacking aa 1-87) were transfected into HEK293E cells with stable shRNA knockdown of endogenous NADK for 24 hours prior to serum-deprivation (16 hours) and labelling for the last hour with  $^{13}\text{C}_3$ - $^{15}\text{N}$ -nicotinamide. Normalized mean peak areas of labeled (M+4)  $\text{NADP}^+$  (B) and (M+4)  $\text{NAD}^+$  (C) are graphed.

(D) Empty vector (Vec), NADK-isoform 1 or  $\Delta\text{N}$ -NADK-isoform1 were stably expressed in NADK-null HEK293 cells generated via CRISPR/Cas9 gene editing. Cells were serum-deprived overnight and labeled for 1 hour with  $^{13}\text{C}_3$ - $^{15}\text{N}$ -nicotinamide to measure basal  $\text{NADP}^+$  synthesis. Normalized mean peak areas of labeled (M+4)  $\text{NADP}^+$  are graphed.

(E) Normalized peak areas of  $\text{NADP}^+$  measured by targeted LC-MS/MS from U87MG cells stably expressing shRNAs targeting the 3'UTR of NADK and exogenous cDNAs of NADK-isoform 1 or the  $\Delta\text{N}$ -isoform 1 mutant, grown under serum-deprived conditions for 16 hours.

(B-E) Data are presented as the mean  $\pm$  SD of biological quadruplicates and are representative of two independent experiments. \* $P < 0.05$  for pairwise comparisons calculated using a two-tailed Student's t-test.

**Table S1. Selective Ion Monitoring (SIM) of metabolites measured for stable isotopic tracing ( $^{13}\text{C}_3$ - $^{15}\text{N}$ -nicotinamide).**

| CompoundName            | Chemical Formula                                                                                      | Ionization | Polarity | ChargeState |
|-------------------------|-------------------------------------------------------------------------------------------------------|------------|----------|-------------|
| Nicotinamide +          | C <sub>6</sub> H <sub>6</sub> N <sub>2</sub> O                                                        | ESI        | +        | 1           |
| Nicotinamide_13C3_15N + | [13]C <sub>3</sub> C <sub>3</sub> H <sub>6</sub> [15]N <sub>1</sub> NO                                | ESI        | +        | 1           |
| NAD +                   | C <sub>21</sub> H <sub>28</sub> N <sub>7</sub> O <sub>14</sub> P <sub>2</sub>                         | ESI        | +        | 1           |
| NAD+_13C3_15N +         | [13]C <sub>3</sub> C <sub>18</sub> H <sub>28</sub> [15]NN <sub>6</sub> O <sub>14</sub> P <sub>2</sub> | ESI        | +        | 1           |
| NADP +                  | C <sub>21</sub> H <sub>29</sub> N <sub>7</sub> O <sub>17</sub> P <sub>3</sub>                         | ESI        | +        | 1           |
| NADP+_13C3_15N +        | [13]C <sub>3</sub> C <sub>18</sub> H <sub>29</sub> [15]NN <sub>6</sub> O <sub>17</sub> P <sub>3</sub> | ESI        | +        | 1           |
| NADPH +                 | C <sub>21</sub> H <sub>30</sub> N <sub>7</sub> O <sub>17</sub> P <sub>3</sub>                         | ESI        | +        | 1           |
| NADPH_13C3_15N+         | [13]C <sub>3</sub> C <sub>18</sub> H <sub>30</sub> [15]NN <sub>6</sub> O <sub>17</sub> P <sub>4</sub> | ESI        | +        | 1           |

**Table S2: Primers used to detect human NADK and NADK2**

| Primer | Forward Sequence        | Reverse Sequence        |
|--------|-------------------------|-------------------------|
| NADK   | CGACGGAGTGATCGTGTCC     | GTGTCCTTGCTTCAGGTGAC    |
| NADK2  | ACAGAAGTTCTATCGTGGTGAGT | AGCTCTTTCAATGTTAAGGGCTC |
| RPLP0  | CAGATTGGCTACCCAACTGTT   | GGGAAGGTGTAATCCGTCTCC   |

## References and Notes

1. I. Ben-Sahra, B. D. Manning, mTORC1 signaling and the metabolic control of cell growth. *Curr. Opin. Cell Biol.* **45**, 72–82 (2017). [doi:10.1016/j.ceb.2017.02.012](https://doi.org/10.1016/j.ceb.2017.02.012) [Medline](#)
2. B. D. Manning, A. Toker, AKT/PKB signaling: Navigating the network. *Cell* **169**, 381–405 (2017). [doi:10.1016/j.cell.2017.04.001](https://doi.org/10.1016/j.cell.2017.04.001) [Medline](#)
3. L. Agledal, M. Niere, M. Ziegler, The phosphate makes a difference: Cellular functions of NADP. *Redox Rep.* **15**, 2–10 (2010). [doi:10.1179/174329210X12650506623122](https://doi.org/10.1179/174329210X12650506623122) [Medline](#)
4. R. C. Stanton, Glucose-6-phosphate dehydrogenase, NADPH, and cell survival. *IUBMB Life* **64**, 362–369 (2012). [doi:10.1002/iub.1017](https://doi.org/10.1002/iub.1017) [Medline](#)
5. R. J. DeBerardinis, N. S. Chandel, Fundamentals of cancer metabolism. *Sci. Adv.* **2**, e1600200 (2016). [doi:10.1126/sciadv.1600200](https://doi.org/10.1126/sciadv.1600200) [Medline](#)
6. H. Hirai, H. Sootome, Y. Nakatsuru, K. Miyama, S. Taguchi, K. Tsujioka, Y. Ueno, H. Hatch, P. K. Majumder, B.-S. Pan, H. Kotani, MK-2206, an allosteric Akt inhibitor, enhances antitumor efficacy by standard chemotherapeutic agents or molecular targeted drugs in vitro and in vivo. *Mol. Cancer Ther.* **9**, 1956–1967 (2010). [doi:10.1158/1535-7163.MCT-09-1012](https://doi.org/10.1158/1535-7163.MCT-09-1012) [Medline](#)
7. I. Ben-Sahra, J. J. Howell, J. M. Asara, B. D. Manning, Stimulation of de novo pyrimidine synthesis by growth signaling through mTOR and S6K1. *Science* **339**, 1323–1328 (2013). [doi:10.1126/science.1228792](https://doi.org/10.1126/science.1228792) [Medline](#)
8. A. M. Robitaille, S. Christen, M. Shimobayashi, M. Cornu, L. L. Fava, S. Moes, C. Prescianotto-Baschong, U. Sauer, P. Jenoe, M. N. Hall, Quantitative phosphoproteomics reveal mTORC1 activates de novo pyrimidine synthesis. *Science* **339**, 1320–1323 (2013). [doi:10.1126/science.1228771](https://doi.org/10.1126/science.1228771) [Medline](#)
9. L. Liu, X. Su, W. J. Quinn 3rd, S. Hui, K. Krukenberg, D. W. Frederick, P. Redpath, L. Zhan, K. Chellappa, E. White, M. Migaud, T. J. Mitchison, J. A. Baur, J. D. Rabinowitz, Quantitative analysis of NAD synthesis-breakdown fluxes. *Cell Metab.* **27**, 1067–1080.e5 (2018). [doi:10.1016/j.cmet.2018.03.018](https://doi.org/10.1016/j.cmet.2018.03.018) [Medline](#)
10. N. Pollak, M. Niere, M. Ziegler, NAD kinase levels control the NADPH concentration in human cells. *J. Biol. Chem.* **282**, 33562–33571 (2007). [doi:10.1074/jbc.M704442200](https://doi.org/10.1074/jbc.M704442200) [Medline](#)
11. N. R. Love, N. Pollak, C. Dölle, M. Niere, Y. Chen, P. Oliveri, E. Amaya, S. Patel, M. Ziegler, NAD kinase controls animal NADP biosynthesis and is modulated via evolutionarily divergent calmodulin-dependent mechanisms. *Proc. Natl. Acad. Sci. U.S.A.* **112**, 1386–1391 (2015). [doi:10.1073/pnas.1417290112](https://doi.org/10.1073/pnas.1417290112) [Medline](#)
12. E. C. Lien, C. A. Lyssiotis, A. Juvekar, H. Hu, J. M. Asara, L. C. Cantley, A. Toker, Glutathione biosynthesis is a metabolic vulnerability in PI(3)K/Akt-driven breast cancer. *Nat. Cell Biol.* **18**, 572–578 (2016). [doi:10.1038/ncb3341](https://doi.org/10.1038/ncb3341) [Medline](#)
13. V. Byles, A. J. Covarrubias, I. Ben-Sahra, D. W. Lamming, D. M. Sabatini, B. D. Manning, T. Horng, The TSC-mTOR pathway regulates macrophage polarization. *Nat. Commun.* **4**, 2834 (2013). [doi:10.1038/ncomms3834](https://doi.org/10.1038/ncomms3834) [Medline](#)

14. I. Ben-Sahra, G. Hoxhaj, S. J. H. Ricoult, J. M. Asara, B. D. Manning, mTORC1 induces purine synthesis through control of the mitochondrial tetrahydrofolate cycle. *Science* **351**, 728–733 (2016). [doi:10.1126/science.aad0489](https://doi.org/10.1126/science.aad0489) [Medline](#)
15. C. A. Lewis, S. J. Parker, B. P. Fiske, D. McCloskey, D. Y. Gui, C. R. Green, N. I. Vokes, A. M. Feist, M. G. Vander Heiden, C. M. Metallo, Tracing compartmentalized NADPH metabolism in the cytosol and mitochondria of mammalian cells. *Mol. Cell* **55**, 253–263 (2014). [doi:10.1016/j.molcel.2014.05.008](https://doi.org/10.1016/j.molcel.2014.05.008) [Medline](#)
16. M. Yuan, S. B. Breitkopf, X. Yang, J. M. Asara, A positive/negative ion-switching, targeted mass spectrometry-based metabolomics platform for bodily fluids, cells, and fresh and fixed tissue. *Nat. Protoc.* **7**, 872–881 (2012). [doi:10.1038/nprot.2012.024](https://doi.org/10.1038/nprot.2012.024) [Medline](#)
